# Supplementary material
Source: publisher figshare collection journal article supplement (https://frontiersin.figshare.com/ndownloader/files/23855417)

(A)

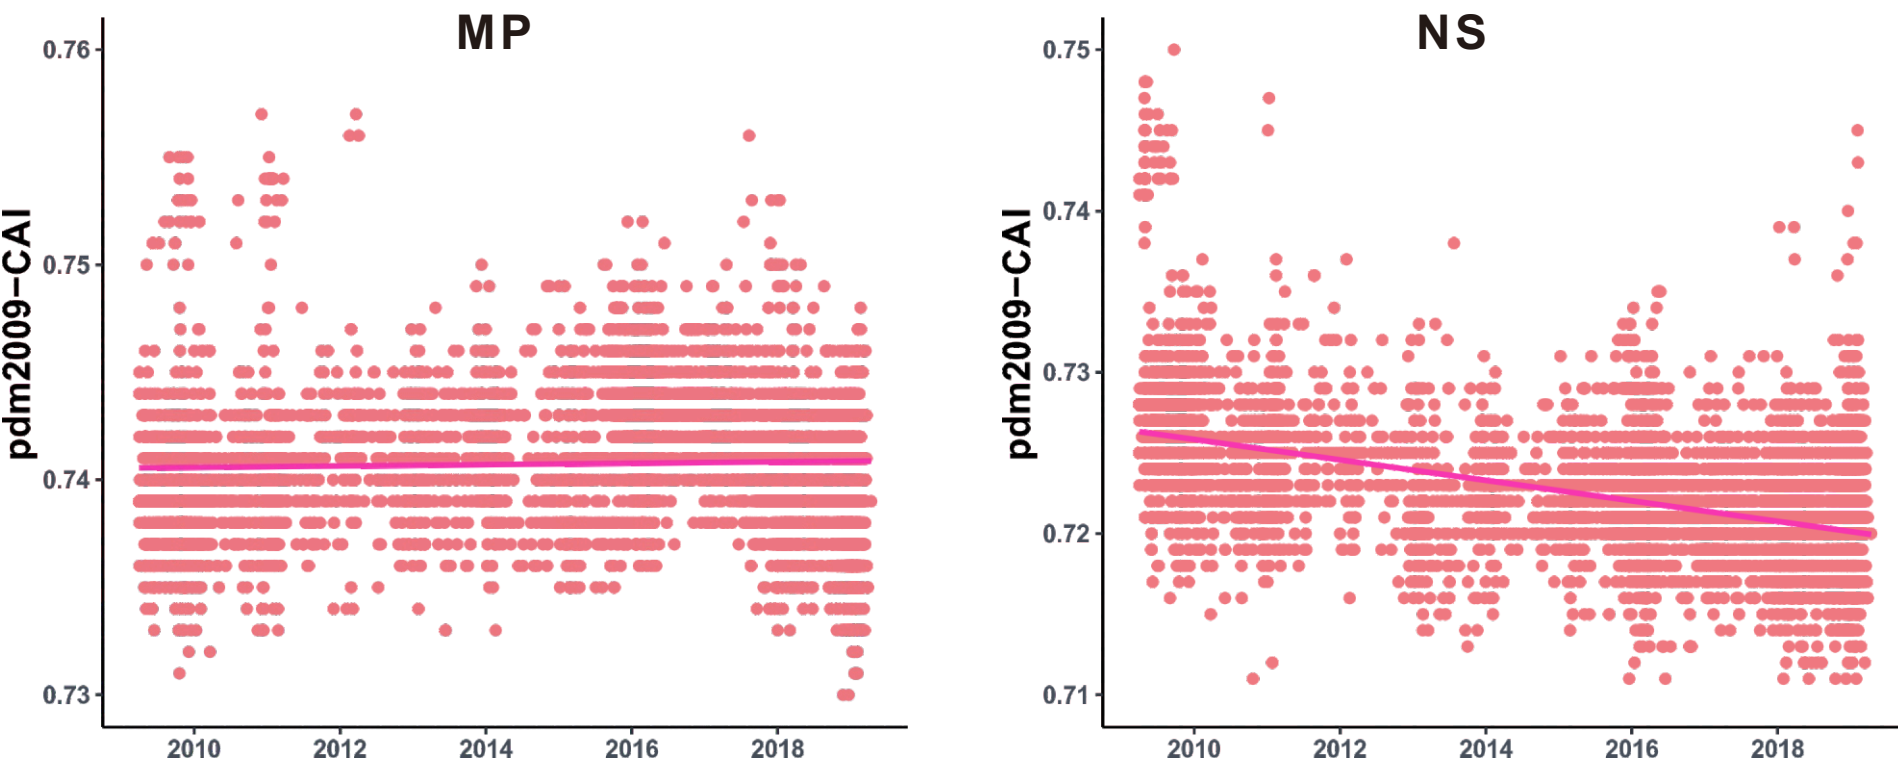

(B)

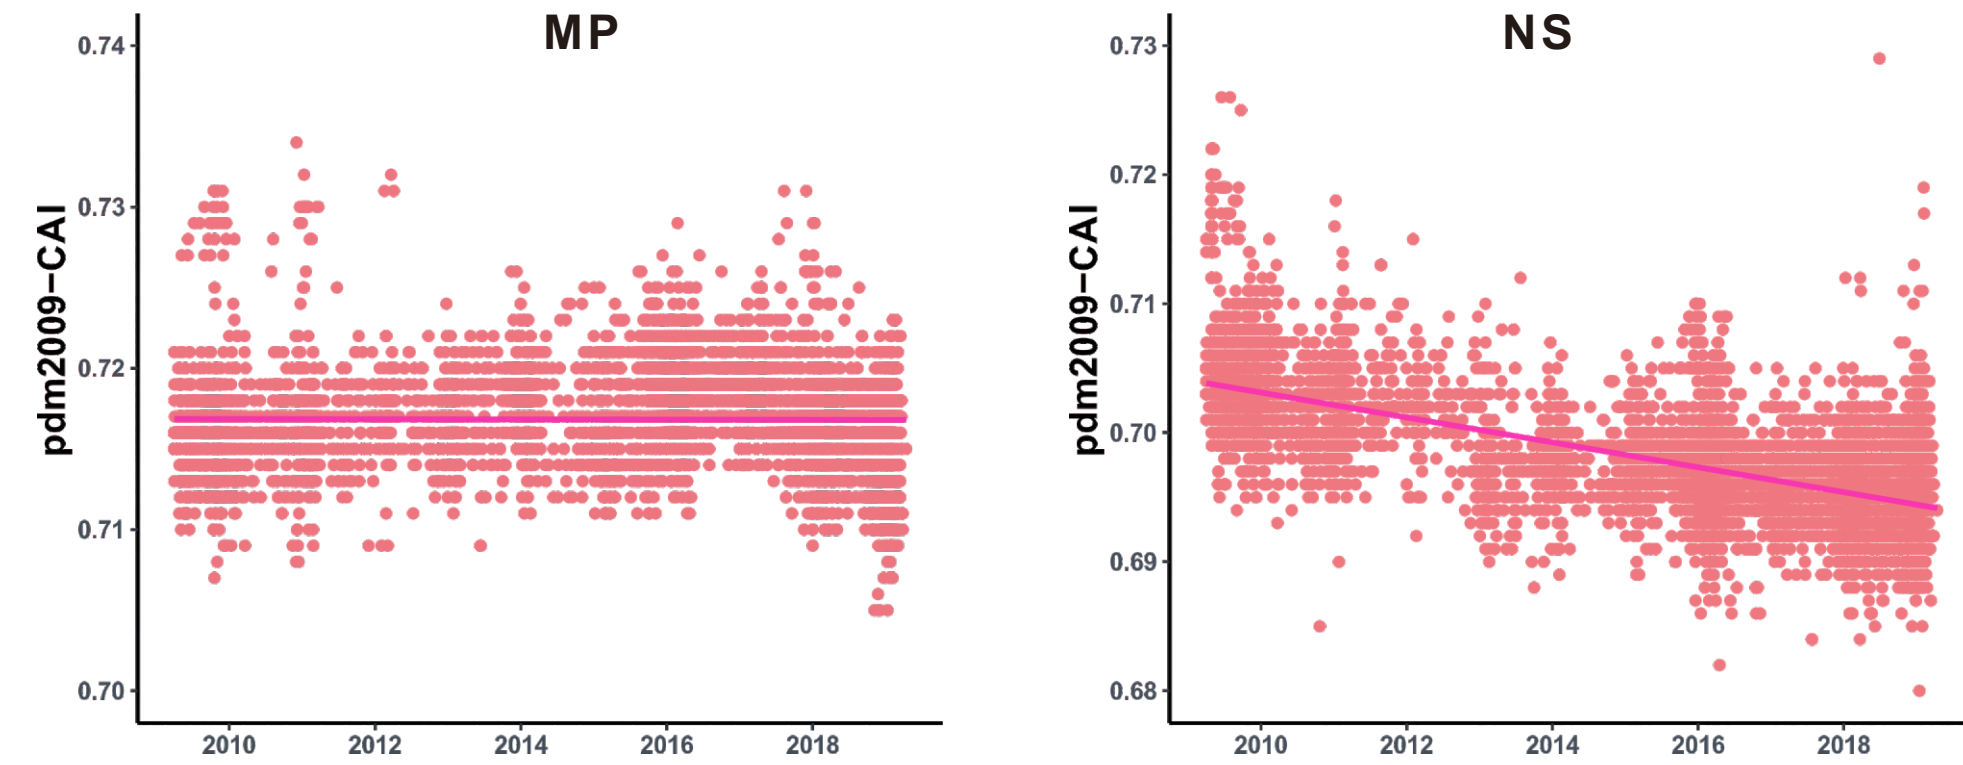

(C)

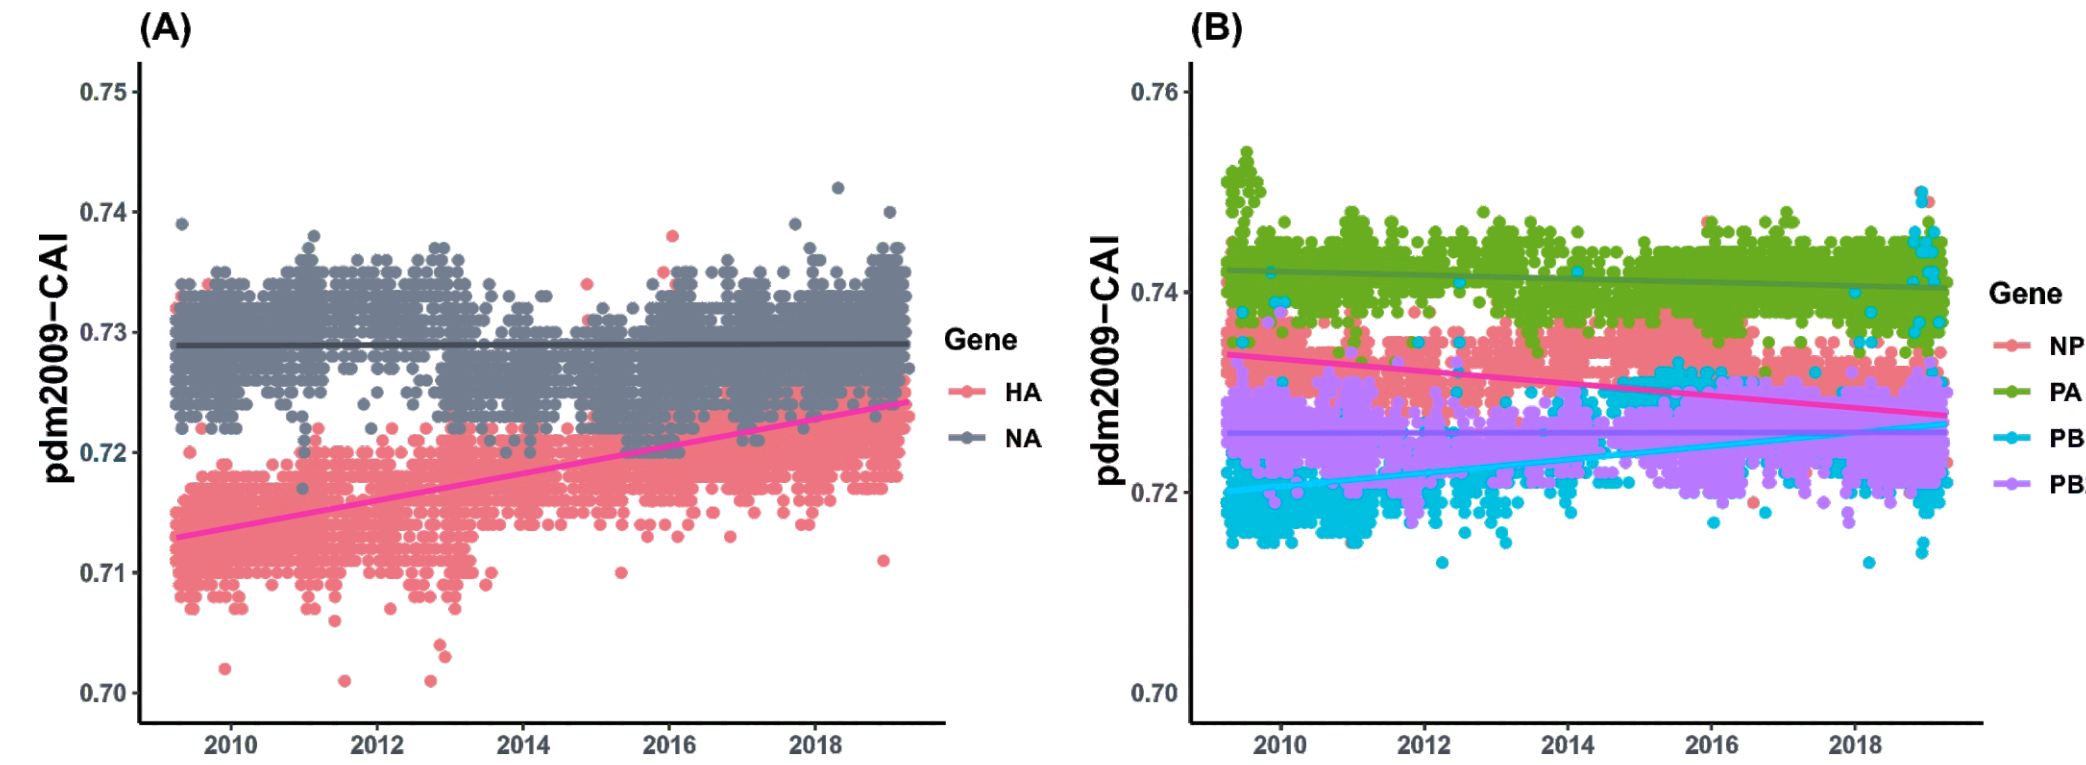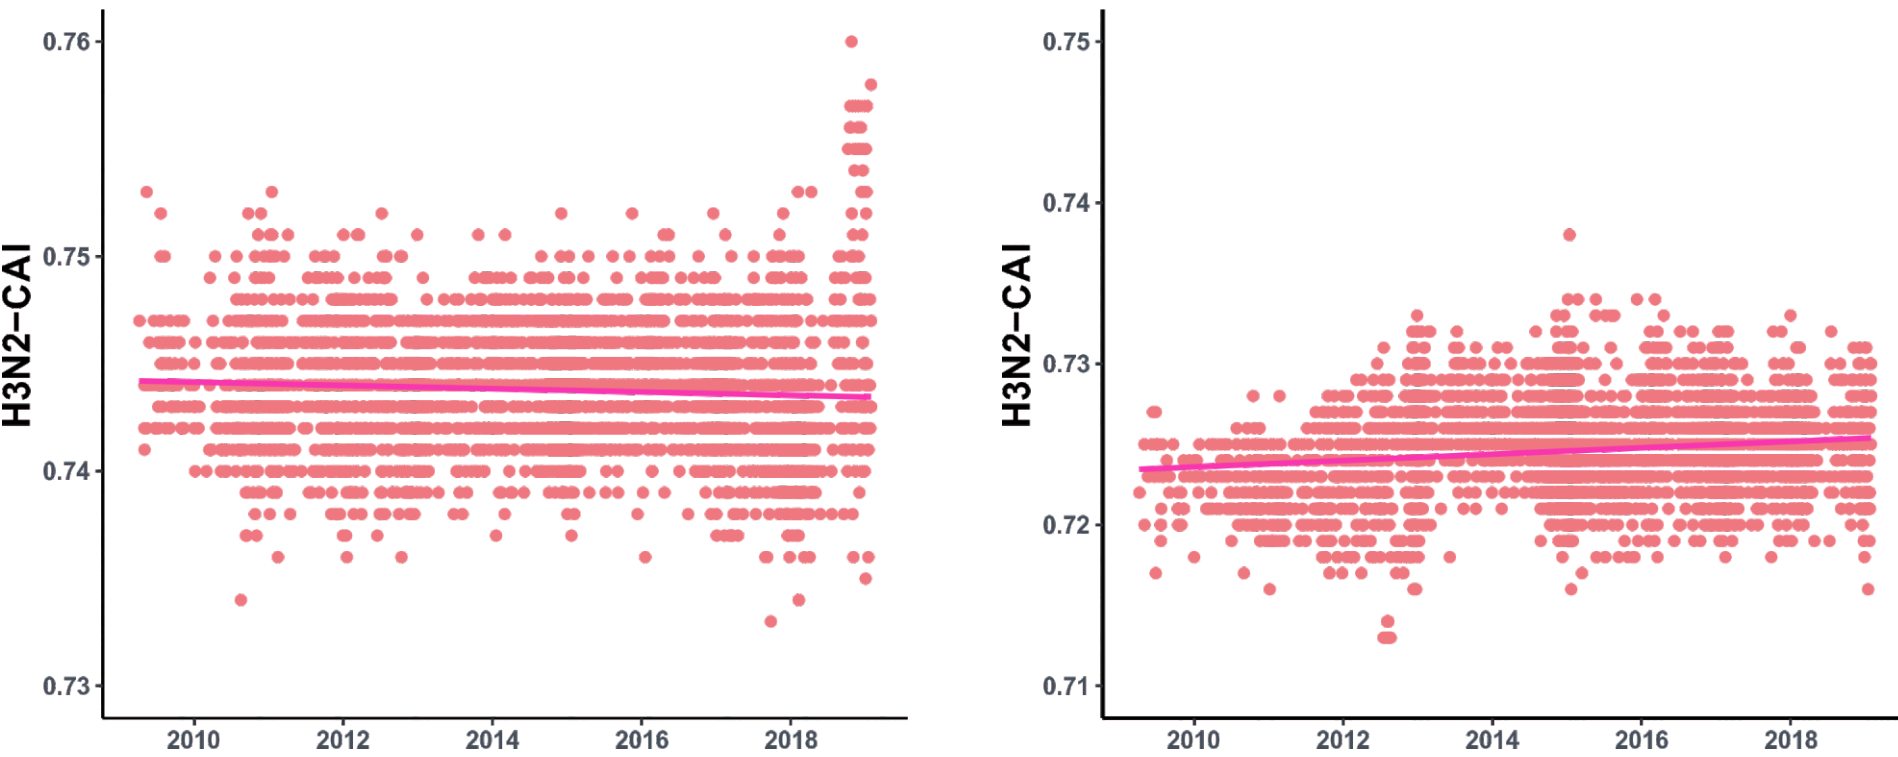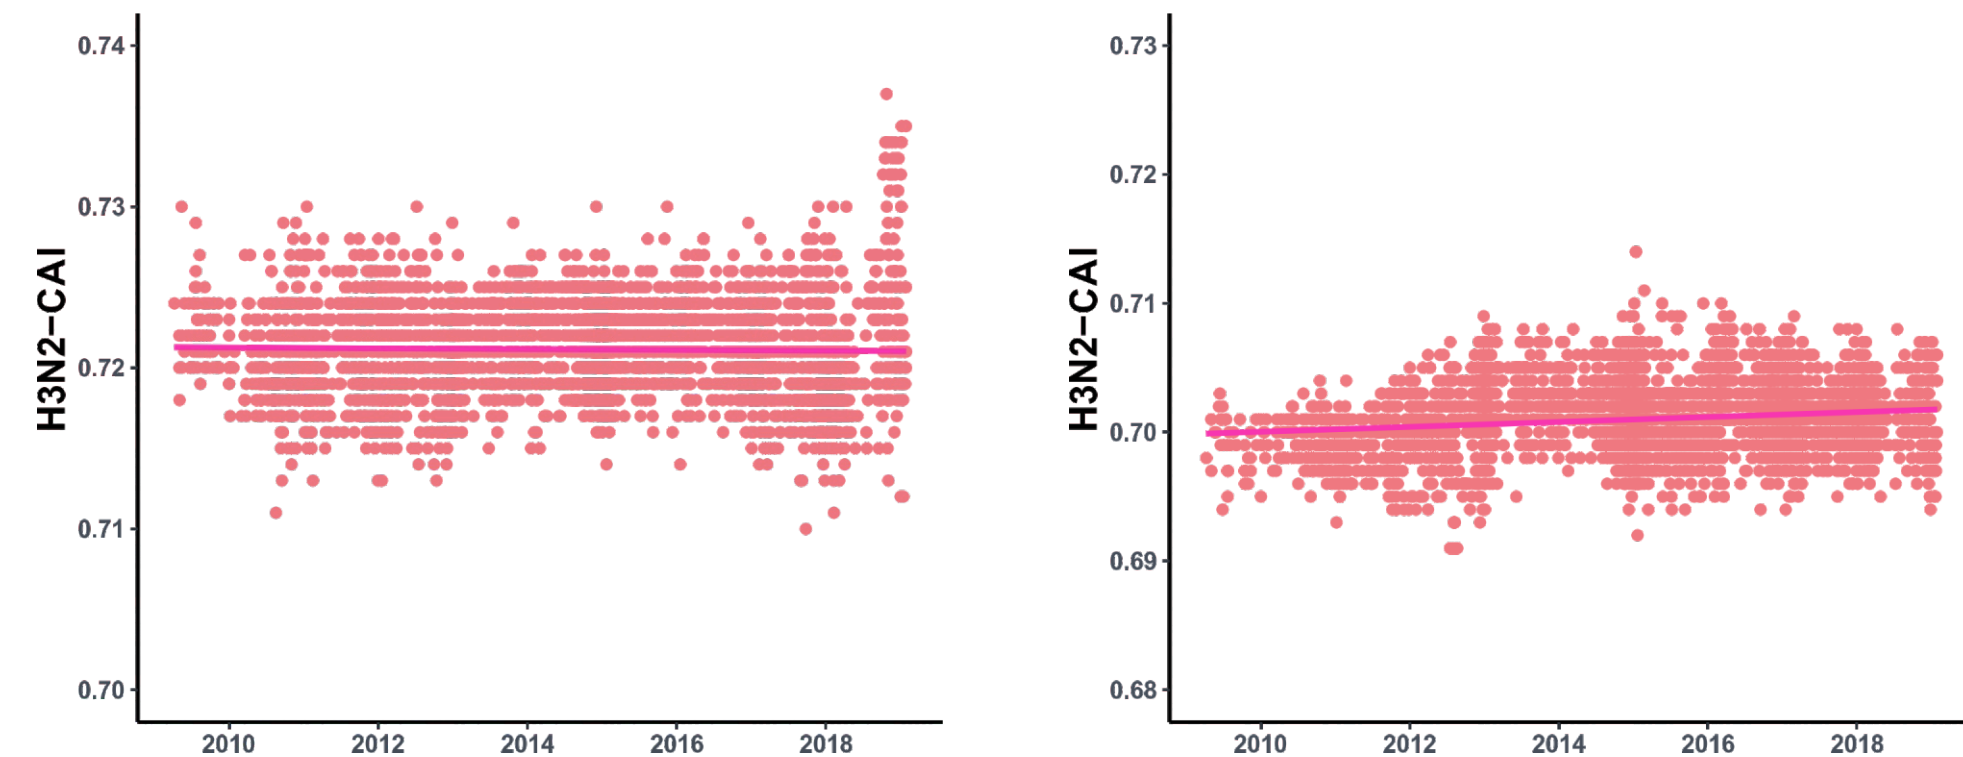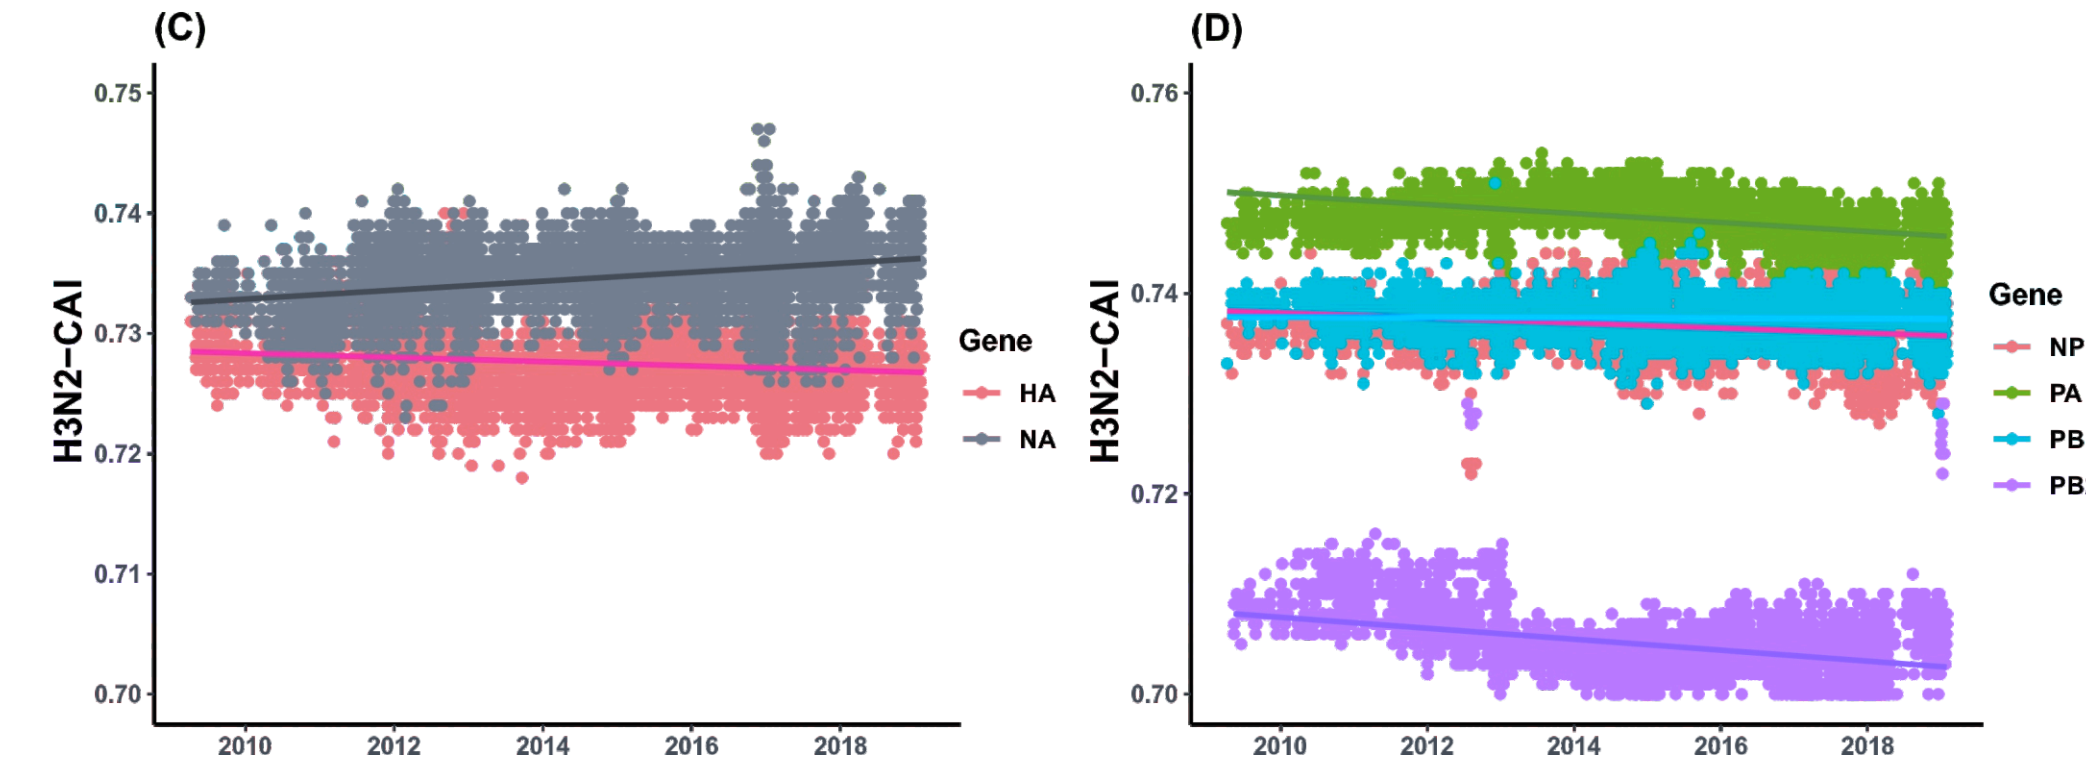

Supplement: Supplementary file [file 23855417]
